# Supplementary material for: Exploring the Links Between Trait Mindfulness and Emotional and Behavioral Responses in the Ultimatum Game
Source: Springer Nature journal article supplement (doi:10.1007/s12671-022-01940-5), 2022-07-06
Supplement: MOESM1 [file 23246194]

**Supplementary Materials**

**Article title:** Trait mindfulness and its association with emotional and behavioral responses in the Ultimatum Game

**Journal Name:** Mindfulness

**Author names:** Kim Lien van der Schans1, Michiel H.H. Kiggen1,2, Konstantinos Tziafetas1, Rob W. Holland1, Johan C. Karremans1.

**Affiliation:**

1Behavioural Science Institute, Radboud University, PO

Box 9104, 6500 HE Nijmegen, The Netherlands

2 Stevig Specialized and Forensic Care for People

With Intellectual Disabilities, Dichterbij, Oostrum,

The Netherlands

**Email address of corresponding author:** kimlien.vanderschans@ru.nl

**Analyses on Unfair Offers only**

**Study 1.** We conducted a GLMER analyses on only the unfair offers (1 through 5 out of 20) (e.g. Güth & Kocher, 2014; Thaler, 1988) in which we assessed the effect of offers and trait mindfulness on the decision to accept/reject. There was a significant main effect of offer (*B* = .32, *Bse* = .11, *z* = 2.80, *p* = .005) and a marginally significant effect of trait mindfulness(*B* = .89, *Bse* = .48, *z* = 1.86, *p* = .06) on acceptance of offers.

**Study 2**. A GLMER analysis was conducted for only the unfair offers (1 through 5 out of 20) with which we assessed the effect of offers and trait mindfulness on the decision to accept/reject. Results showed a significant effect of offer (*B* = 1.32, *Bse* = .33, *z* = 4.02, *p* < .001), but no effect of trait mindfulness (*B* = .30, *Bse* = .50, *z* = .59, *p* = .56).

**Analyses on Non-believers**

In Study 2, there were 24 participants who did not belief that the other in the Ultimatum Game was real. Omitting these participants from analyses did not change the interpretation of the results. Results of the LMER analysis showed a significant effect of offer *(b* = 7.95, *t* = 21.75, *p* <.001), no effect of trait mindfulness (*b* = 1.63. *t* = 1.13, *p* = .26) and a marginally significant effect of their interaction on the emotional reactions to offers (*b* = -.69, *t* = 1.90, *p* = .06). Also, GLMER analysis indicated a significant effect of offer (b = 1.85, z = 7.46, p < .001), but no effect of trait mindfulness (*b* = -.13, *z* = -.35, *p* = .72) nor their interaction on acceptance of offers (*b* = -.23, *z* = -1.46, *p* = .14).

**Analyses on Meditators vs Non-meditators**

In both studies, participants were asked whether they had any meditation experience and if so they were asked about how long they had been meditating (in months), which type of meditation they practice and how often they meditated per week.

In the following analyses meditator vs non-meditator was used as dichotomous predictor.

**Study 1**. The factor meditator (y/n) was entered as a contrast coded predictor, together with offer and their interaction in a general logistic mixed model analysis. Results indicated a significant effect of offer (*B* = 1.23, *Bse* = .17, *z* = 7.16, *p* < .001), but no effect of meditator (*B* = -.43, *Bse* = .76, *z* = -.57, *p* =.57), nor their interaction (*B* = .26, *Bse* = .24, *z* = 1.09, *p* =.27).

**Study 2**. Again GLMER was used to assess the effect of the meditator (y/n: contrast coded), offer and their interaction of acceptance of offers. Results showed a significant effect of offer (*B* = 1.87, *Bse* = .24, *z* = 7.69, *p* < .001), but no effect of meditator (*B* = .13, *Bse* = .40, *z* = .34, *p* =.73) nor their interaction (*B* = .04, *Bse* = .16, *z* = .27, *p* = .78). A LMER analysis was conducted to assess the effect of meditator (y/n: contrast coded), offer and their interaction on emotional reactions to offers. Results showed a significant effect of offer (*B* = 7.90, *Bse* = .35, *t* = 22.89, *p* < .001), but no effect of meditator (*B* = -.36, *Bse* = 1.34, *t* = -/27, *p* =.94). nor their interaction (*B* = .03, *Bse* = .35, *t* = .08, *p* =.94).
